# Supplementary figures and images for: Secretion of protein disulphide isomerase AGR2 confers tumorigenic properties
Source: eLife journal article supplement (doi:10.7554/elife.13887), 2016-05-30

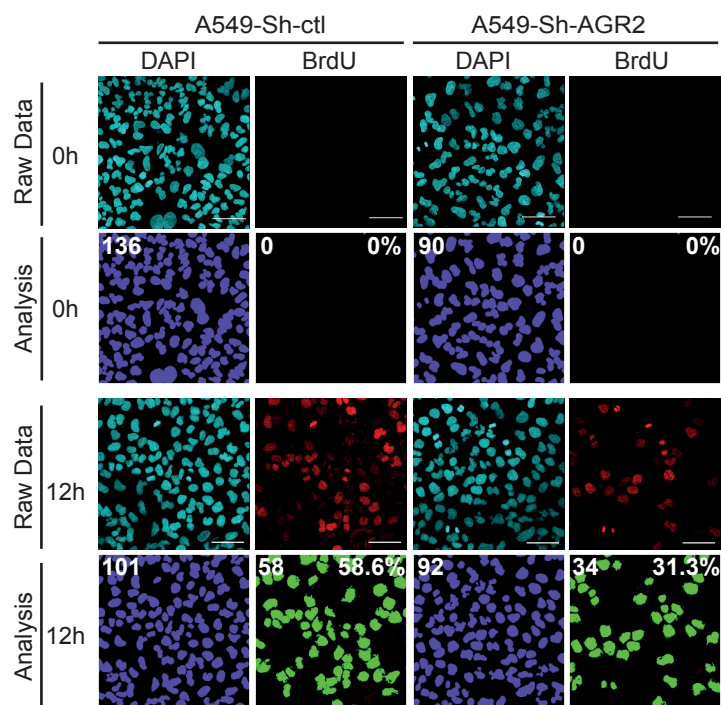

Supplement: supp [file elife_poa_e13887_Figure_2_figure_supplement_1.pdf › elife_poa_e13887_Figure_2_figure_supplement_1.pdf]

Figure 5-figure supplement 1

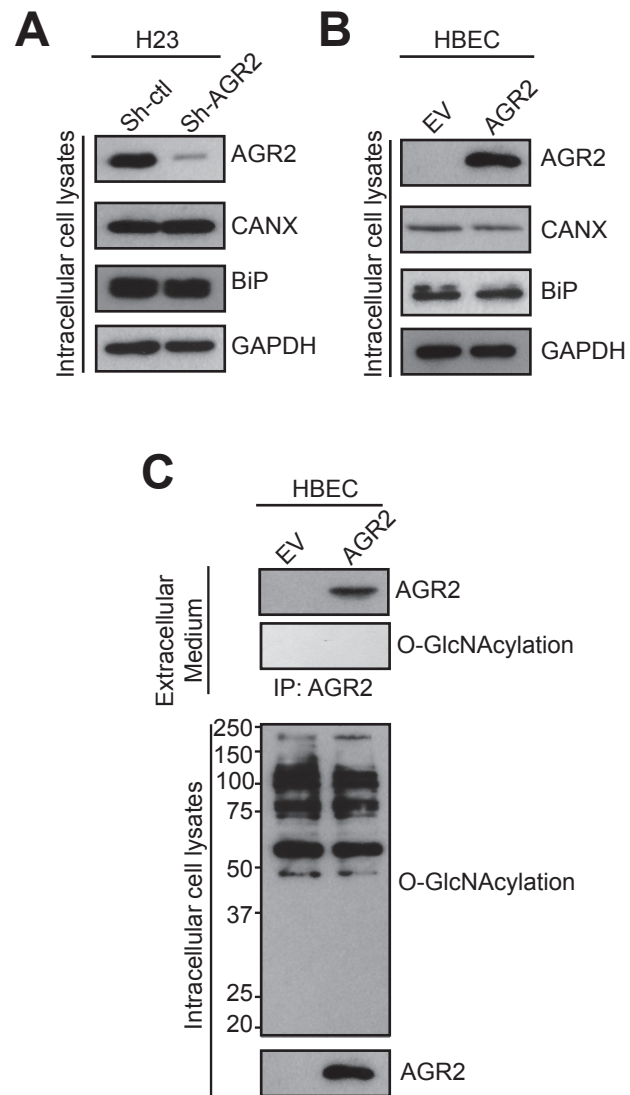

Supplement: supp [file elife_poa_e13887_Figure_5_figure_supplement_1.pdf › elife_poa_e13887_Figure_5_figure_supplement_1.pdf]

Figure 6-figure supplement 1

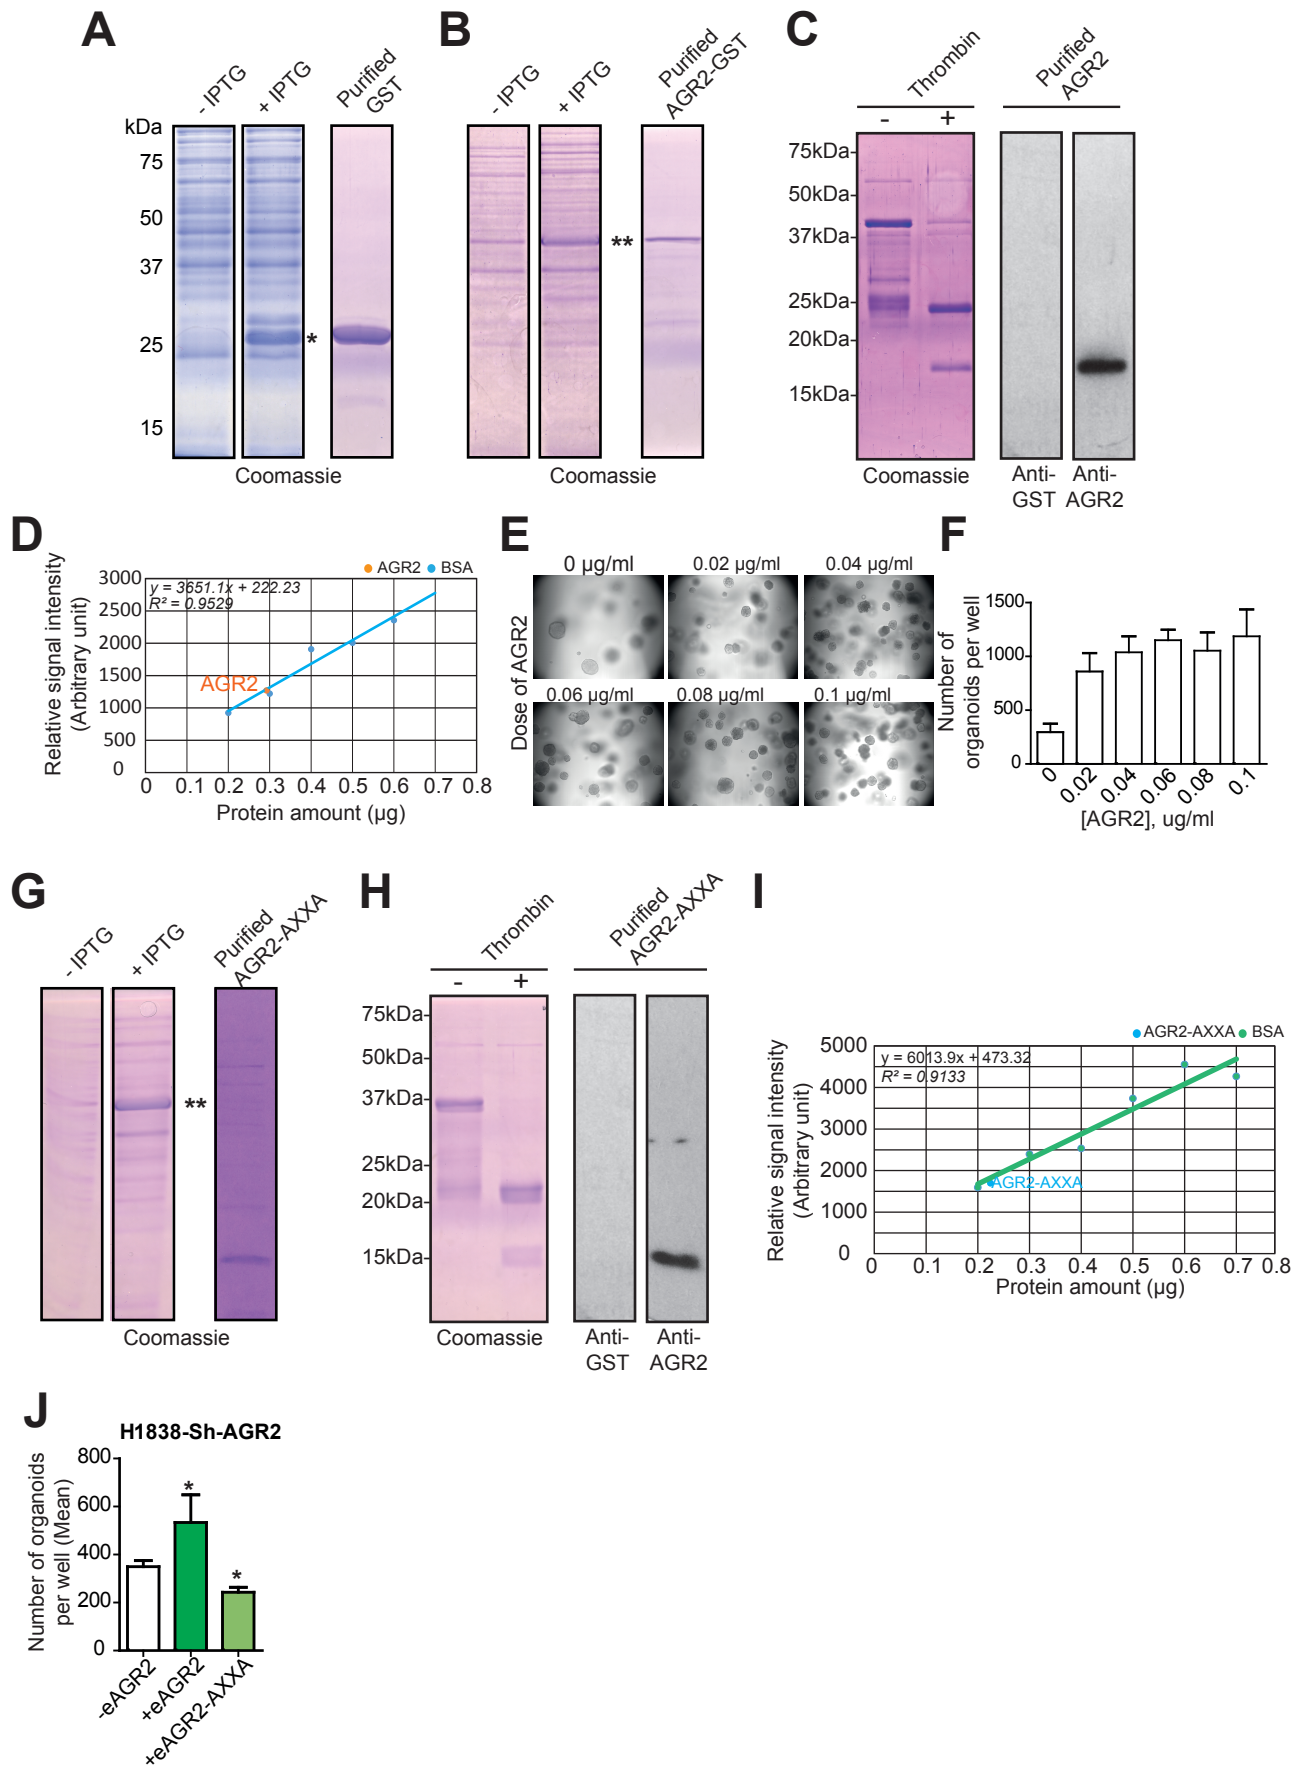

Supplement: supp [file elife_poa_e13887_Figure_6_figure_supplement_1.pdf › elife_poa_e13887_Figure_6_figure_supplement_1.pdf]

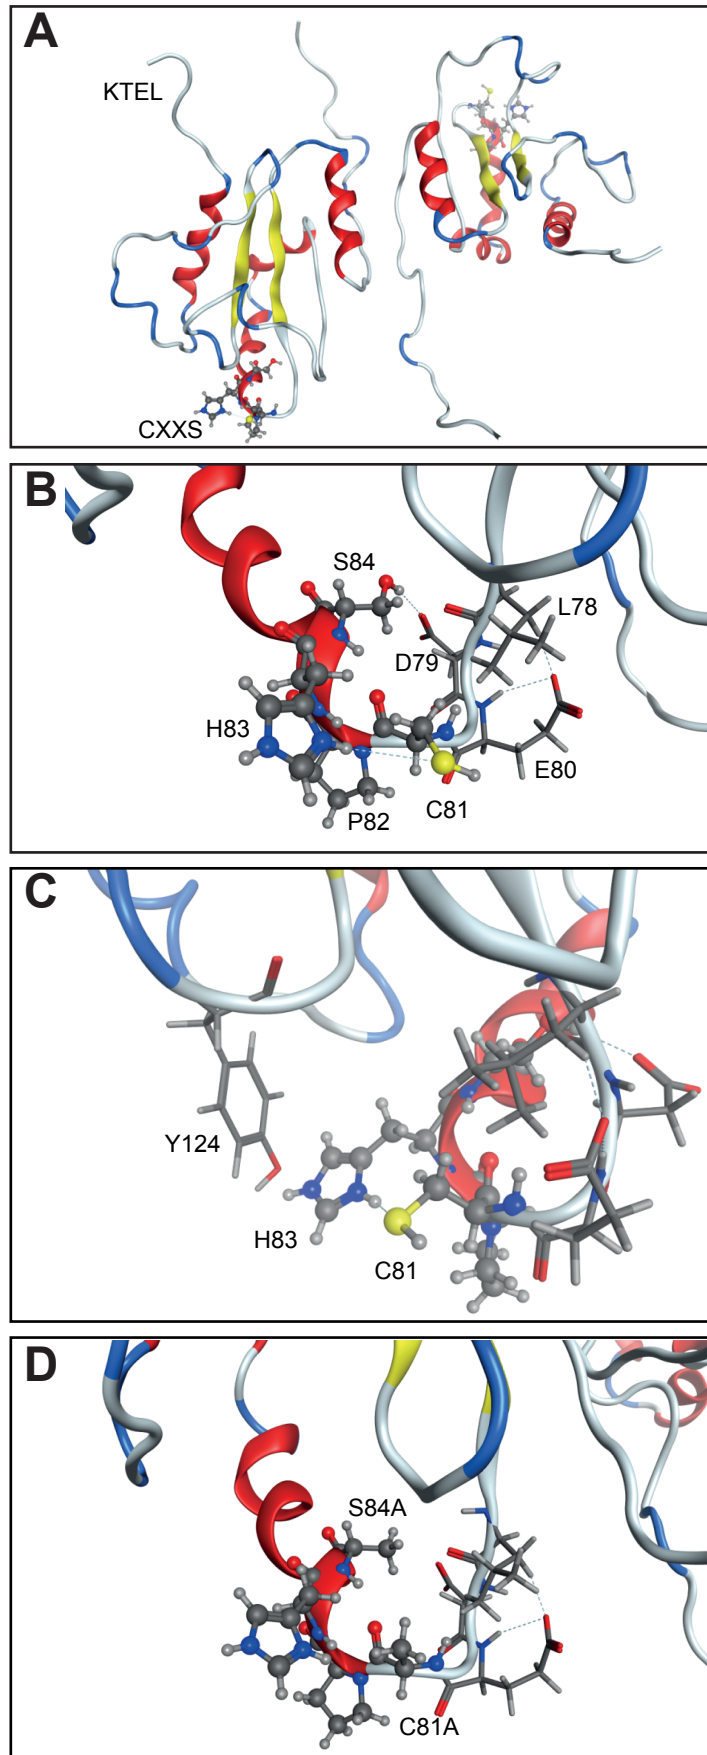

Supplement: supp [file elife_poa_e13887_Figure_6_figure_supplement_2.pdf › elife_poa_e13887_Figure_6_figure_supplement_2.pdf]

Figure 9-figure supplemental 1

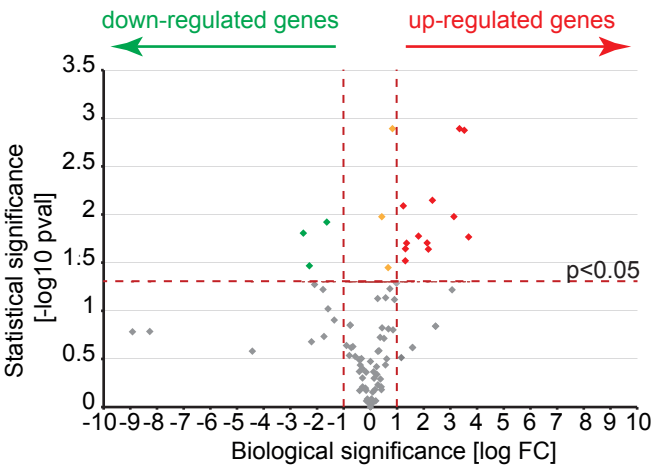

Supplement: supp [file elife_poa_e13887_Figure_9_figure_supplement_1.pdf › elife_poa_e13887_Figure_9_figure_supplement_1.pdf]
